# Supplementary material for: Evidence for the impact of fire activity on daily variations of IASI mid-tropospheric CO 2 anomalies at 8–11 km
Source: Copernicus journal article supplement (doi:10.5194/egusphere-2025-6426), 2026-02-04
Supplement: Supplementary file 1 [file egusphere-2025-6426-supplement.pdf]

# Supplementary

| Filters     | August                 |                                   | September              |                                   | October                |                                   | Whole fire season                 |                                   |
|-------------|------------------------|-----------------------------------|------------------------|-----------------------------------|------------------------|-----------------------------------|-----------------------------------|-----------------------------------|
|             | Anomalies filtered (%) | Anomalies collocated with FRP (%) | Anomalies filtered (%) | Anomalies collocated with FRP (%) | Anomalies filtered (%) | Anomalies collocated with FRP (%) | Anomalies filtered (%)            | Anomalies collocated with FRP (%) |
| No filters  | /                      | 29.7                              | /                      | 48.0                              | /                      | 41.1                              | /                                 | 39.7                              |
| Filter 1    | 2.0                    | 29.8                              | 2.6                    | 48.5                              | 3.5                    | 42.0                              | 2.8                               | 40.2                              |
| Filter 2    | 25.4                   | 39.1                              | 12.8                   | 54.0                              | 8.2                    | 44.4                              | 14.9                              | 45.9                              |
| Filter 3    | 19.3                   | 36.8                              | 14.7                   | 56.2                              | 18.9                   | 50.6                              | 17.7                              | 48.2                              |
| Filter 4    | 66.8                   | 48.7                              | 45.5                   | 61.6                              | 49.1                   | 56.1                              | 53.4                              | 56.4                              |
| Filter 5    | 2.6                    | 30.5                              | 4.5                    | 50.3                              | 9.5                    | 45.4                              | 5.8                               | 42.1                              |
| All filters | 76.0                   | 65.5                              | 58.3                   | 78.9                              | 63.7                   | 77.4                              | 65.8                              | 75.4                              |
| Filters     | Longitudinal period    |                                   | Circular period        |                                   | Combined period        |                                   |                                   |                                   |
|             | Anomalies filtered (%) | Anomalies collocated with FRP (%) | Anomalies filtered (%) | Anomalies collocated with FRP (%) | Anomalies filtered (%) |                                   | Anomalies collocated with FRP (%) |                                   |
| No filters  | /                      | 40.1                              | /                      | 40.0                              | /                      |                                   | 38.3                              |                                   |
| Filter 1    | 2.6                    | 40.5                              | 1.7                    | 40.2                              | 4.9                    |                                   | 39.6                              |                                   |
| Filter 2    | 19.1                   | 49.1                              | 14.9                   | 46.0                              | 7.9                    |                                   | 41.3                              |                                   |
| Filter 3    | 17.0                   | 48.3                              | 16.5                   | 47.9                              | 21.2                   |                                   | 48.6                              |                                   |
| Filter 4    | 54.2                   | 57.4                              | 51.7                   | 57.0                              | 55.0                   |                                   | 53.5                              |                                   |
| Filter 5    | 4.5                    | 42.0                              | 6.1                    | 42.6                              | 7.6                    |                                   | 41.5                              |                                   |
| All filters | 66.2                   | 76.2                              | 64.2                   | 75.3                              | 68.1                   |                                   | 74.0                              |                                   |

**Table S1:** Percentage of MT-CO<sub>2</sub> anomalies filtered successively by the 5 filters described in Section 3.1 and percentage of the remaining anomalies actually collocated with FRP at month level, transport regimes level and all fire season level.
